# Supplementary material for: Cyclophosphamide as an Reproductive Hazard: Disrupted Riboflavin Metabolism and Circadian Rhythms Drive Ovarian Decline
Source: Research Square preprint supplement (doi:10.21203/rs.3.rs-7510145/v1), 2025-10-03

Supplementary Figure 1: PCA and RSD (K=Ctral, M=CTX)

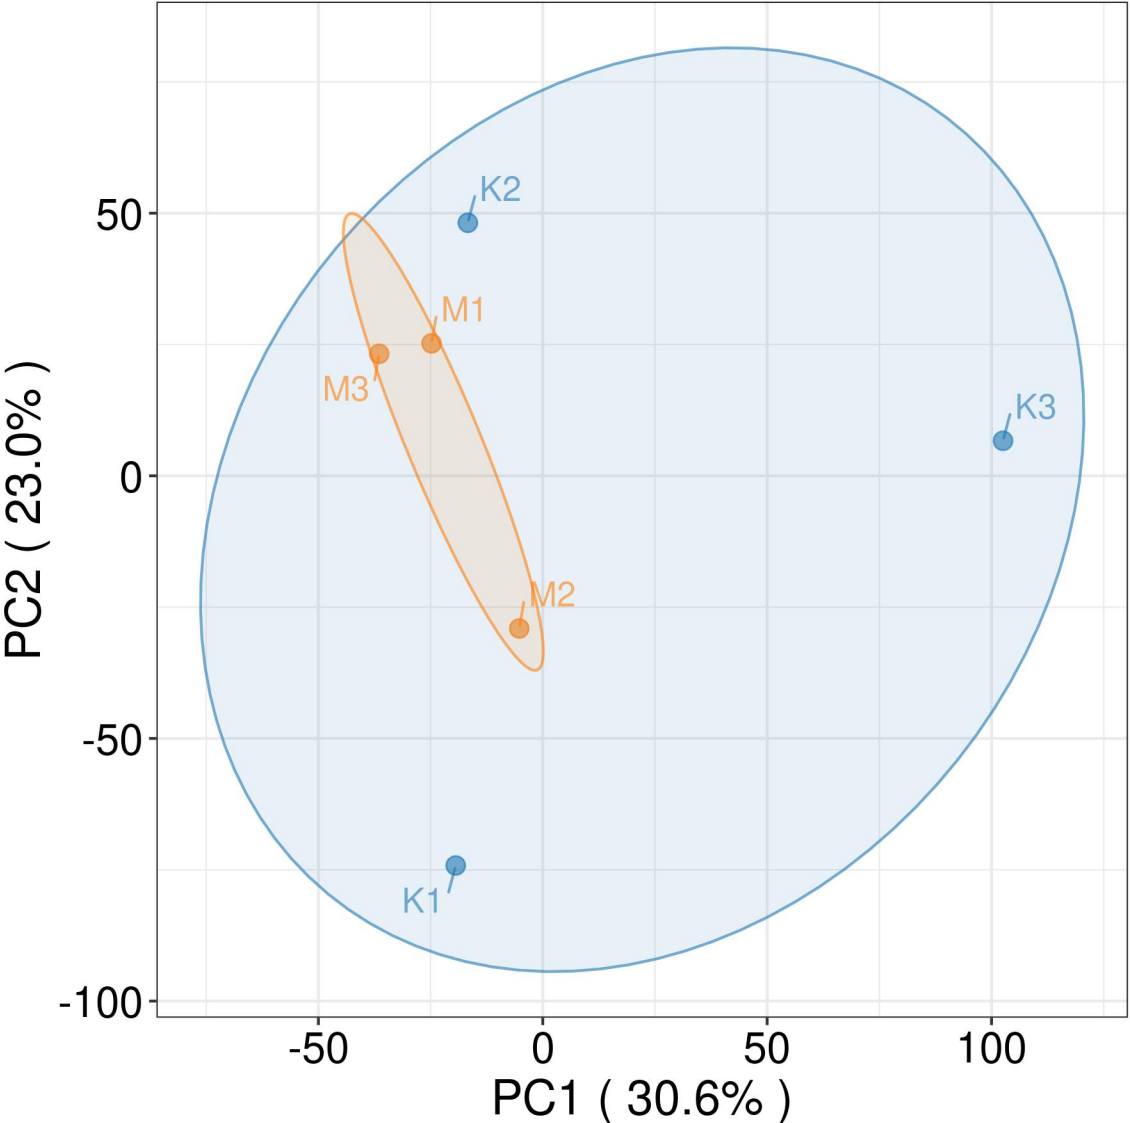

Group  
K  
M

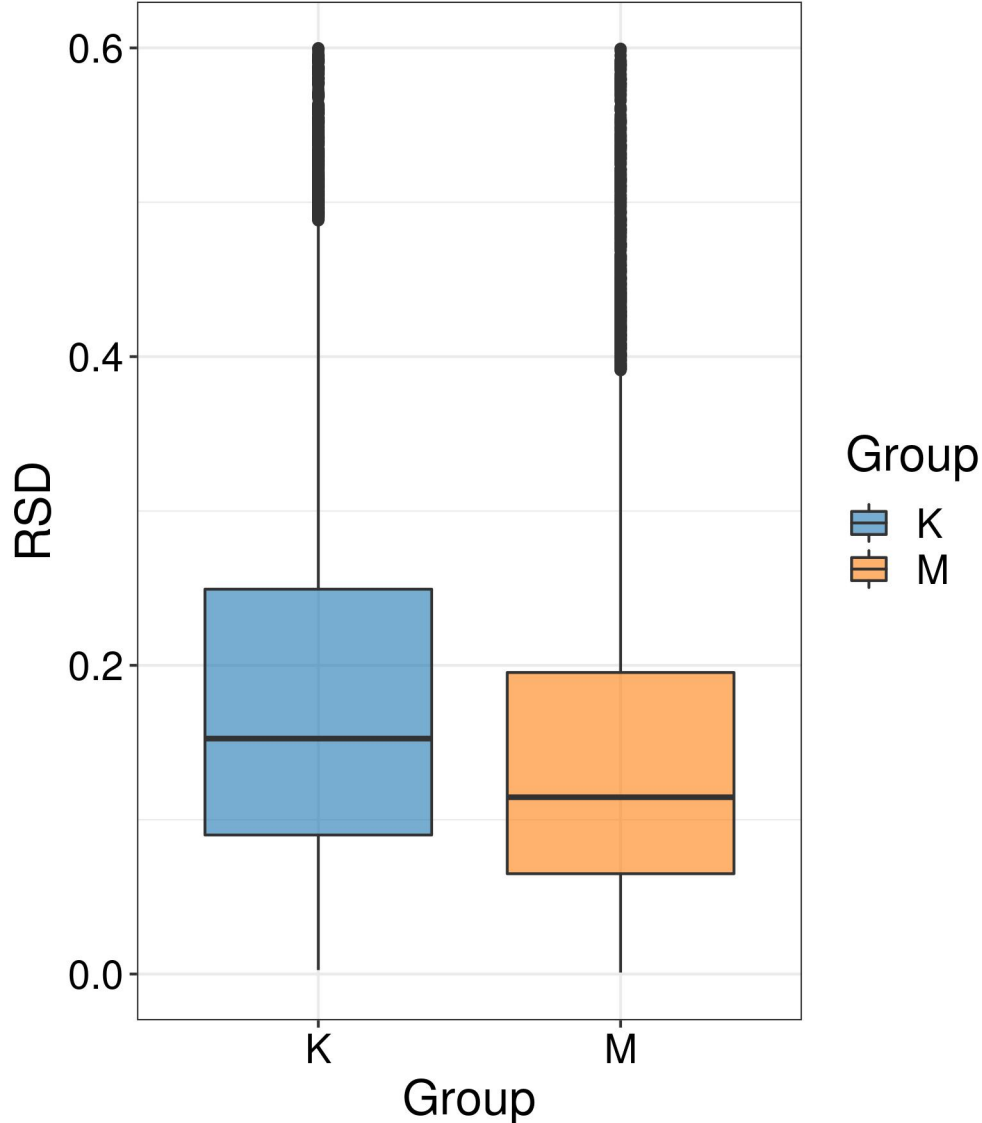

Group  
K  
M

Uncropped gels for Western Blots in Figure 1

F1-E

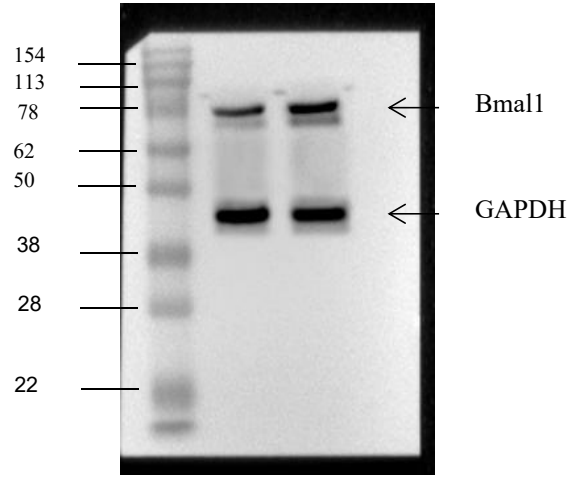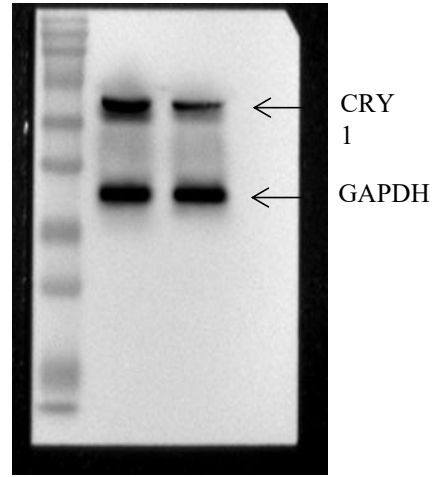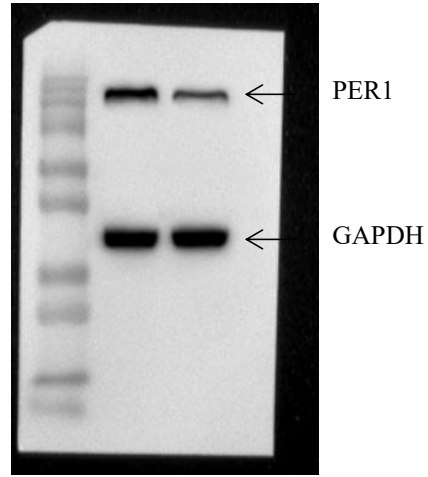

# Uncropped gels for Western Blots in Figure 3

## F3-A

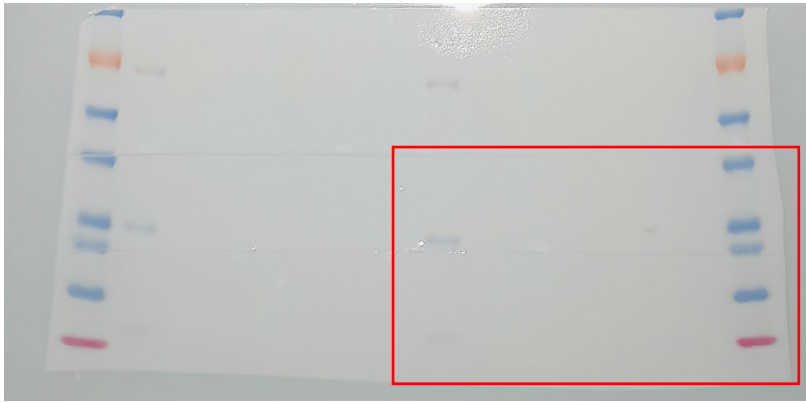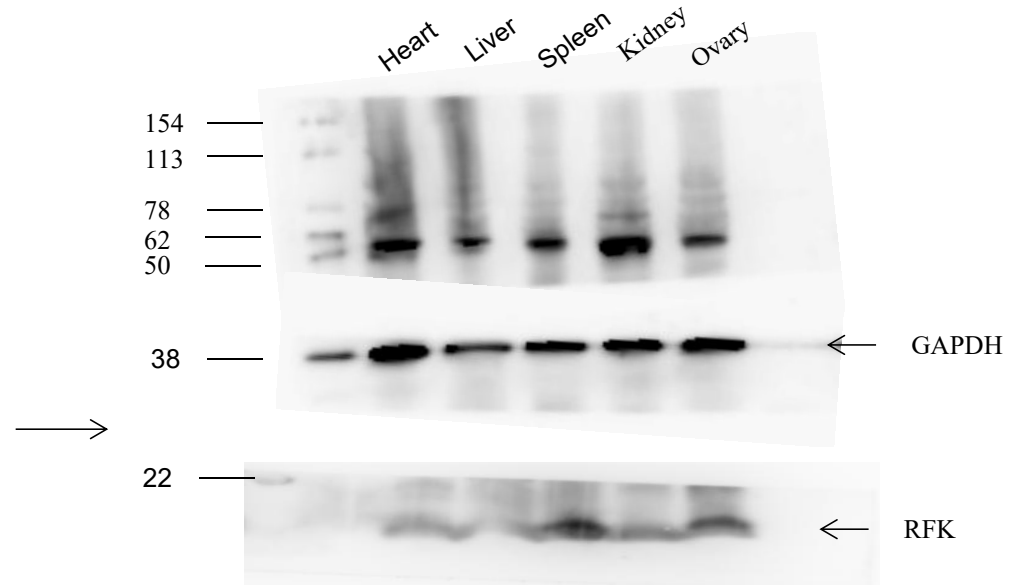

## F3-C

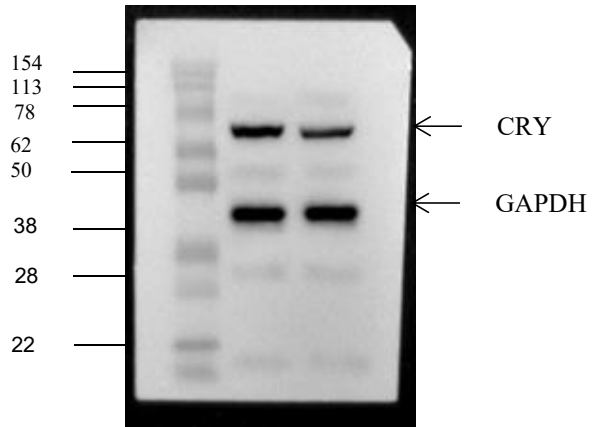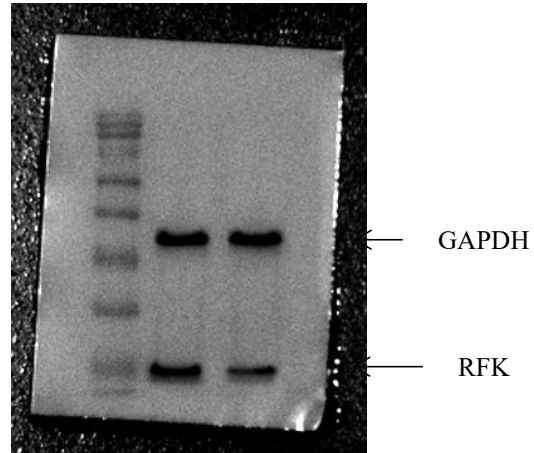

Uncropped gels for Western Blots in Figure 4

F4-A

FLAD1 siRNA  
Ctrl #1 #2 #3

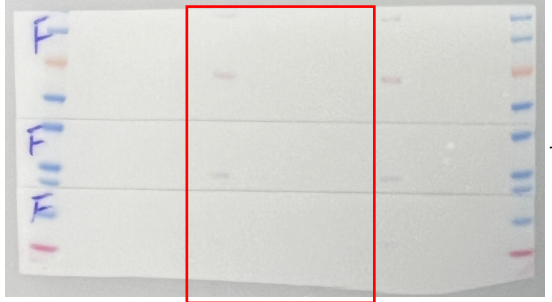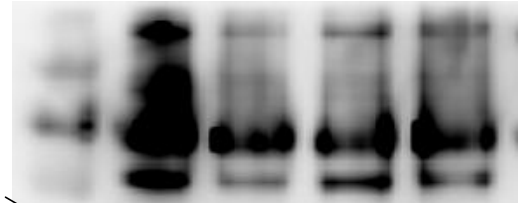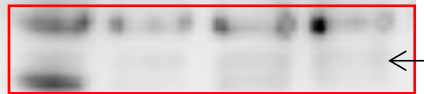

FADS

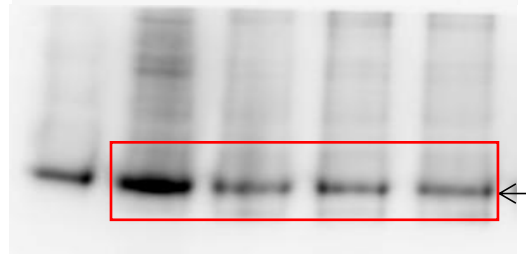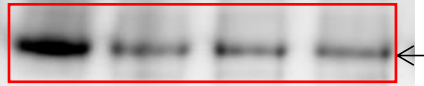

CRY2

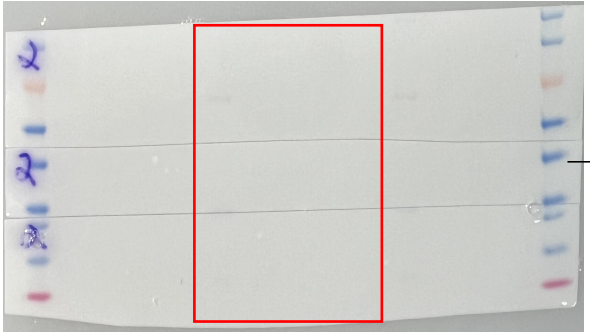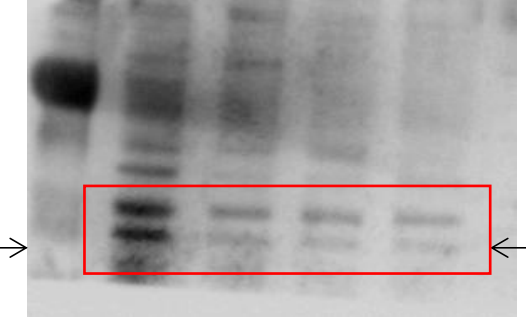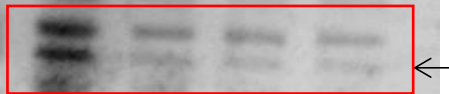

CRY1

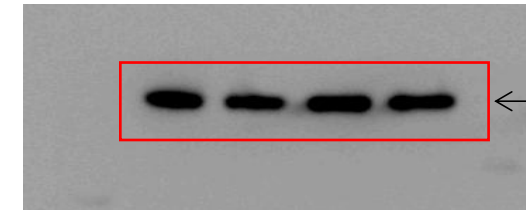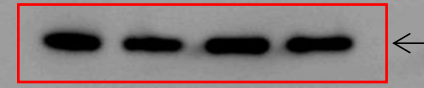

GAPDH

F4-B

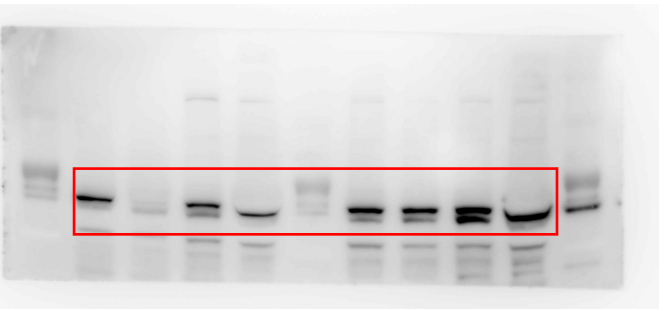

CRY1

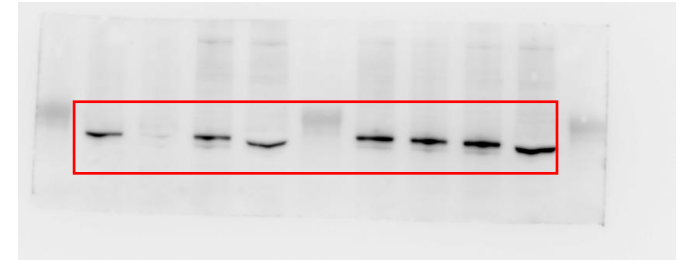

CRY2

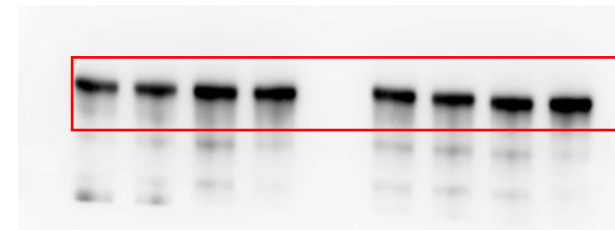

GAPDH

Uncropped gels for Western Blots in Figure 4

F4-C

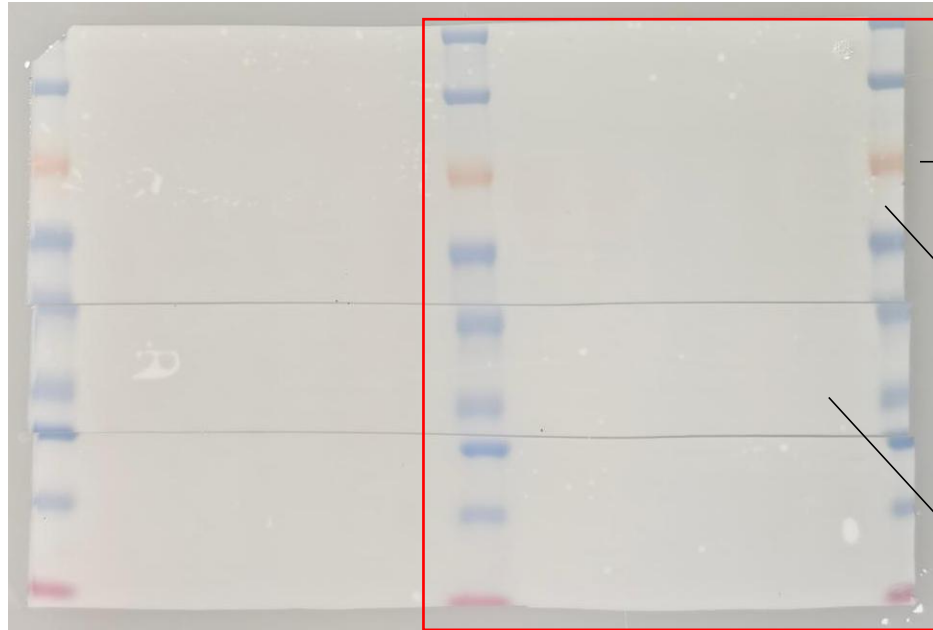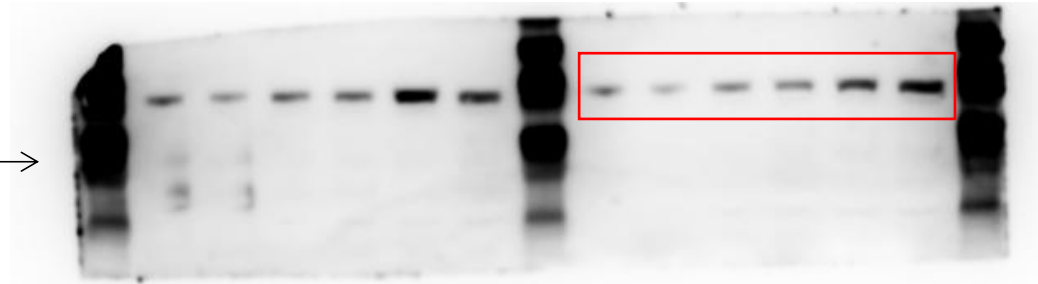

CRY2

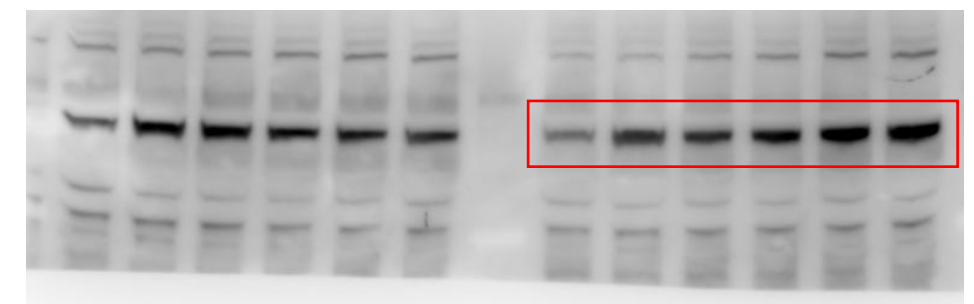

CRY1

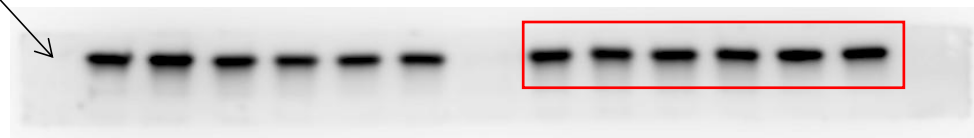

GAPDH

# Uncropped gels for Western Blots in Figure 5

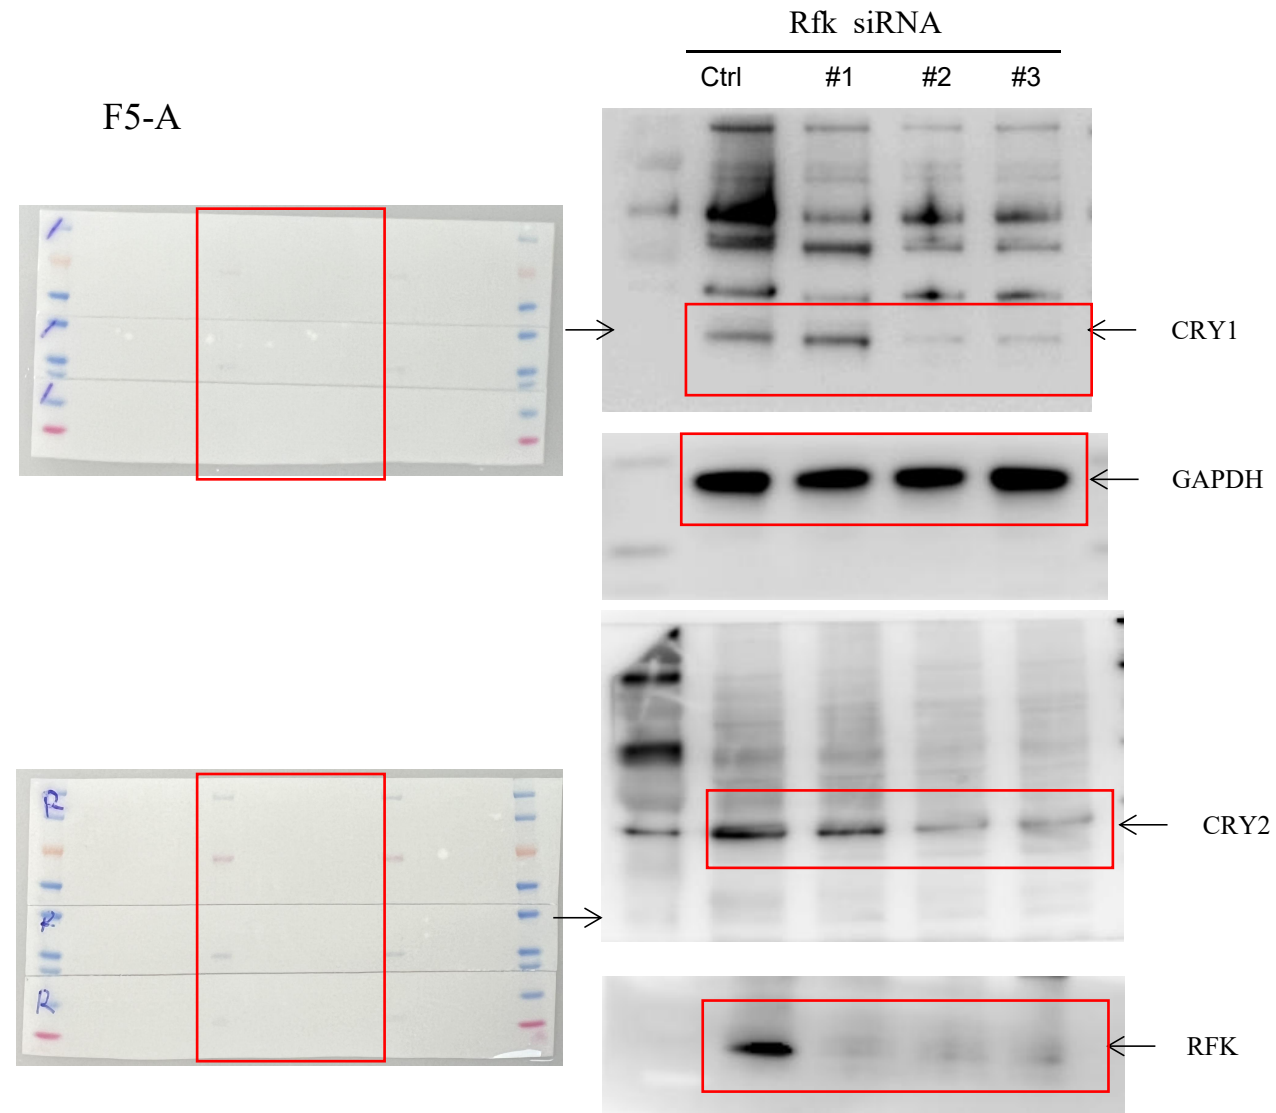

Uncropped gels for Western Blots in Figure 4

F5-B

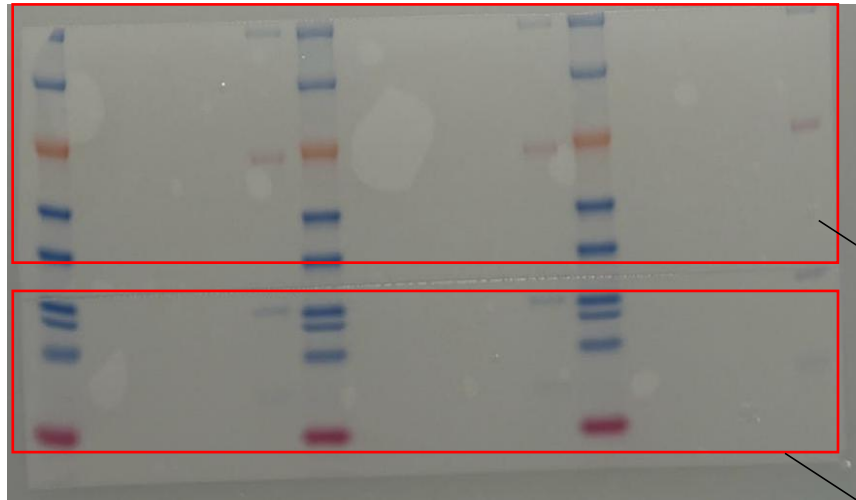

Input    IP  
          IgG    CRY1

Input    IP  
          IgG    CRY1

Input    IP  
          IgG    CRY1

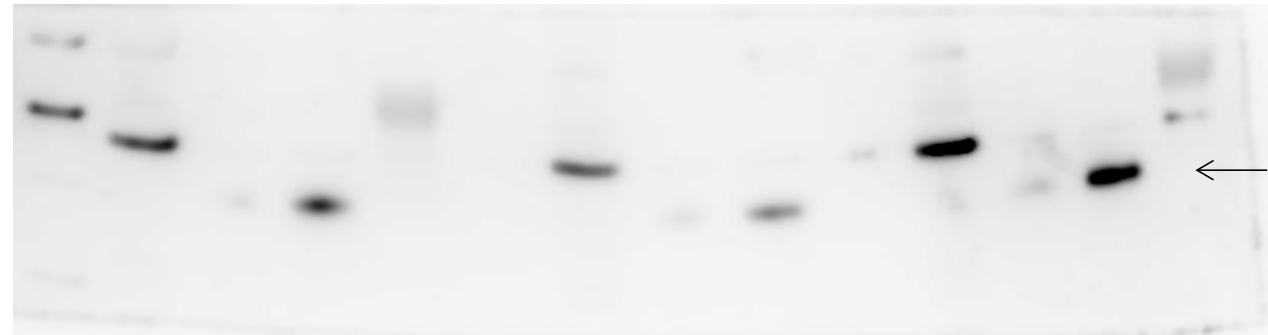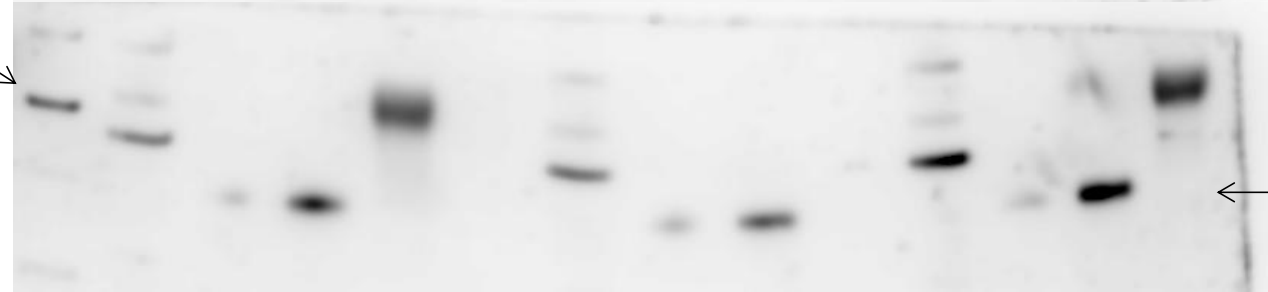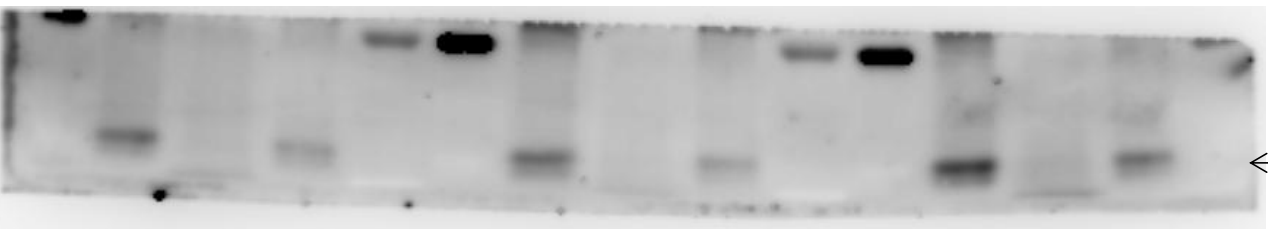

Supplement: Supplementary file 1 [file 7fda024f49d00763c6cb323c.pdf]
