# Supplementary material for: Cyclophosphamide as an Reproductive Hazard: Disrupted Riboflavin Metabolism and Circadian Rhythms Drive Ovarian Decline
Source: Research Square preprint supplement (doi:10.21203/rs.3.rs-7510145/v1), 2025-10-03
Supplement: Supplementary file 1 [file ec9d4cf2c14bbd0e4e7d0aa3.xlsx]

## Sheet: Supplementary Table S1
Supplementary Table S1：siRNA sequence informations
Sequence name	Sequence informations
rRfk-siRNA-1	Sequence-Sense	CCAUCAUGUUGCAUAGAAATT
	Sequence-Antisense	UUUCUAUGCAACAUGAUGGTT
rRfk-siRNA-2	Sequence-Sense	GGGAGUGGAGAGGUCCAUAAAT
	Sequence-Antisense	UUUAUGGACCUCUCCACUCCCTT
rRfk-siRNA-3	Sequence-Sense	UCUGCGAUUCAAGGUGAUAUUT
	Sequence-Antisense	AAUAUCACCUUGAAUCGCAGAT
rFlad1-siRNA-1	Sequence-Sense	CGCAAGALACCAACACUUATT
	Sequence-Antisense	UAAGUGUUGGUAUCUUGCGTT
rFlad1-siRNA-2	Sequence-Sense	GGACACCAUCAAGAGGUAUAAT
	Sequence-Antisense	UUAUACCUCUUGAUGGUGUCCT
rFlad1-siRNA-3	Sequence-Sense	GAAGGCCAGUGAGGCUGUUUAT
	Sequence-Antisense	UAAACAGCCUCACUGGCCUUCTT

## Sheet: Supplementary Table S2
Supplementary Table S2: The list of primers
Primer names	Primer sequence (5'-3')	Species
Clock(1）-F	TGGATTGGTGGAAGAAGATGACA	Rat
Clock(1）-R	CATTACCAGGAAGCATAGACCCC
Rfk-F	GGCTACCTCAGACCTGAAAAGAACT	Rat
Rfk-R	GTTAACTGCTGGAGACCTCTTGACA
BMAL1-F	GAGGCGTCGGGACAAAATGA	Rat
BMAL1-R	GCTTCTGTGTATGGGTTGGTGG
Cry1(3)-F	TGGAGGAGCTCGGTTTTGATAC	Rat
Cry1(3)-R	CAGGGAGTTTGCATTCATTCG
Per1-F	GGTCACGGAGTCATCCAATCA	Rat
Per1-R	TCTGACTGCTGCGAGTGATGC
GAPDH-F	CTGGAGAAACCTGCCAAGTATG	Rat
GAPDH-R	GGTGGAAGAATGGGAGTTGCT
PER2-F	CTGCGAAGCGCCTCATT	Rat
PER2-R	GTTATGCTCCGCCTCTGTCA
Cry2-F	GACTACGGCTCCACGACAAC	Rat
Cry2-R	CTGCAGTAGGAACCTCCATCG
Flad1-F	AGGTGGAATGATACAAGATCAGC	Rat
Flad1-R	GGTATCTTGCGTGTGTCCCTTA
Per3-F	CCGAACAGCTCCTGGACATT	Rat
Per3-R	TCCGGCAACACTTTCTGACT
Rfk-F	CTGTCTCCGCTGCCCTCCAG	Human
Rfk-R	GACCACAGGCCACTGCGAATC
Flad1-F	CCACCCTCCCTGCTCCAGATAC	Human
Flad1-R	TCCGCTCCTCTTCTTCGTTCTCC
Cry1-F	ACTCCCGTCTGTTTGTGATTCGTG	Human
Cry1-R	AATAGCTGCGTCTCGTTCCTTTCC
BMAL1-F	TGCCACCAATCCATACACAGAAGC	Human
BMAL1-R	ATCTTCCCTCGGTCACATCCTACG
GAPDH-F	CCAGCAAGAGCACAAGAGGAAGAG	Human
GAPDH-R	GGTCTACATGGCAACTGTGAGGAG

## Sheet: Supplementary Table S3
Supplementary Table S3：Antibody information
Antibody name	Manufacturer
FLAD1	proteintech	#14118-1-AP	1/1000	50kd
RFK	proteintech	#15813-1-AP	1/1000	18kd
BMAL1	abcam	ab235577	1/1000	75kd
CRY1	proteintech	13474-1-AP	1/1000	66kd
CRY2	proteintech	13997-1-AP	1/500	65-75kd
PER	abcam	ab227872	1/500	136kd
GAPDH	proteintech	10494-1-AP	1/20000	36kd
HRP-conjugated Goat Anti-Rabbit IgG	proteintech	SA00001-2	1/20000
